# Supplementary material
Source: publisher figshare collection journal article supplement (https://acs.figshare.com/ndownloader/files/5672724)
Supplement: Supplementary file 1 [file 5672724]

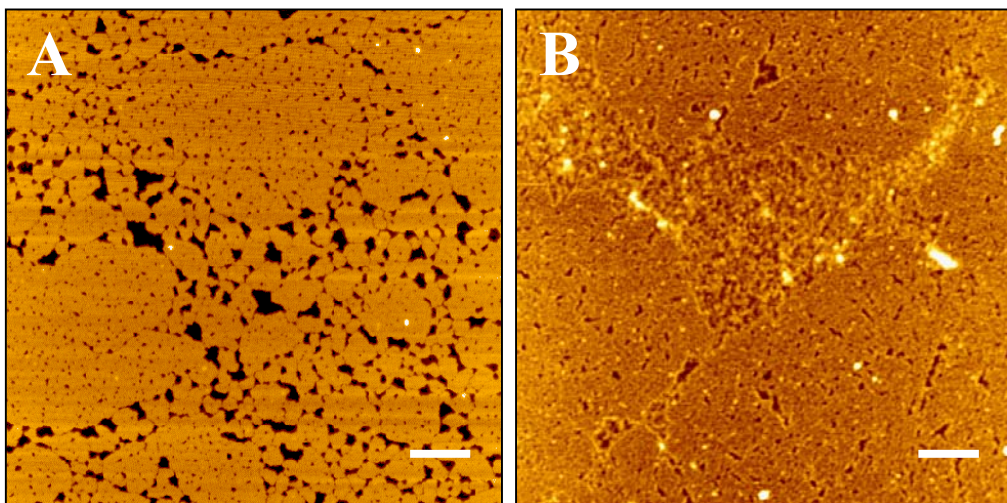

Supporting material. Topography images of LB-films of HFBI (A) and HFBII (B) on mica measured by AFM. Image size is  $1 \times 1 \mu\text{m}^2$ . The bar represents 100 nm. The HFBI sample does not have amorphous material in between the crystalline areas as HFBII does.
